# Supplementary material for: Efficacy and Safety of Dihydroartemisinin-Piperaquine Versus Artemether-Lumefantrine for Treatment of Uncomplicated Plasmodium Falciparum Malaria In African Children: A Systematic Review And Meta-Analysis of Randomized Control Trials
Source: Research Square preprint supplement (doi:10.21203/rs.3.rs-536158/v1), 2021-05-24
Supplement: Supplementary file 1 [file 60b37ea3fc593581eff539b4.docx]

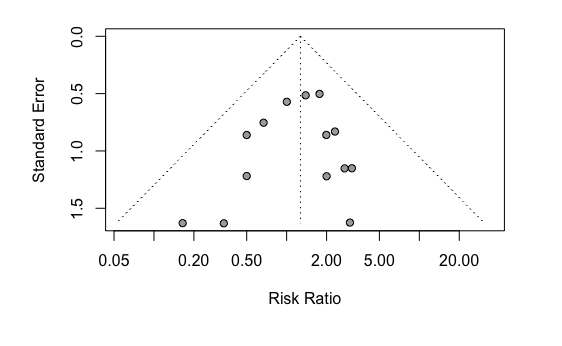


Additional file S20: Funnel plot of comparison: dihydroartemisinin-piperaquine versus artemether-lumefantrine for treatment of uncomplicated *plasmodium falciparum* malaria in African children, outcome: Serious adverse event (including death).
