# Supplementary material for: Efficacy and Safety of Dihydroartemisinin-Piperaquine Versus Artemether-Lumefantrine for Treatment of Uncomplicated Plasmodium Falciparum Malaria In African Children: A Systematic Review And Meta-Analysis of Randomized Control Trials
Source: Research Square preprint supplement (doi:10.21203/rs.3.rs-536158/v1), 2021-05-24
Supplement: Supplementary file 2 [file 90c71c58de7de8701f631dfa.docx]

**
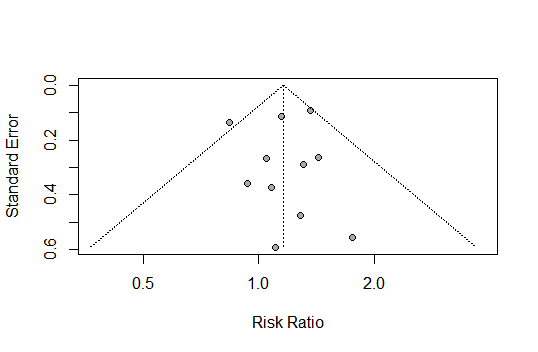
**

Additional file S14: Funnel plot of comparison: dihydroartemisinin-piperaquine versus artemether-lumefantrine for treatment of uncomplicated *plasmodium falciparum* malaria in African children, outcome: Gastrointestinal adverse events (diarrhea).
