# Supplementary material for: Efficacy and Safety of Dihydroartemisinin-Piperaquine Versus Artemether-Lumefantrine for Treatment of Uncomplicated Plasmodium Falciparum Malaria In African Children: A Systematic Review And Meta-Analysis of Randomized Control Trials
Source: Research Square preprint supplement (doi:10.21203/rs.3.rs-536158/v1), 2021-05-24
Supplement: Supplementary file 3 [file bd23a7df28f5f382dc6b83e2.docx]

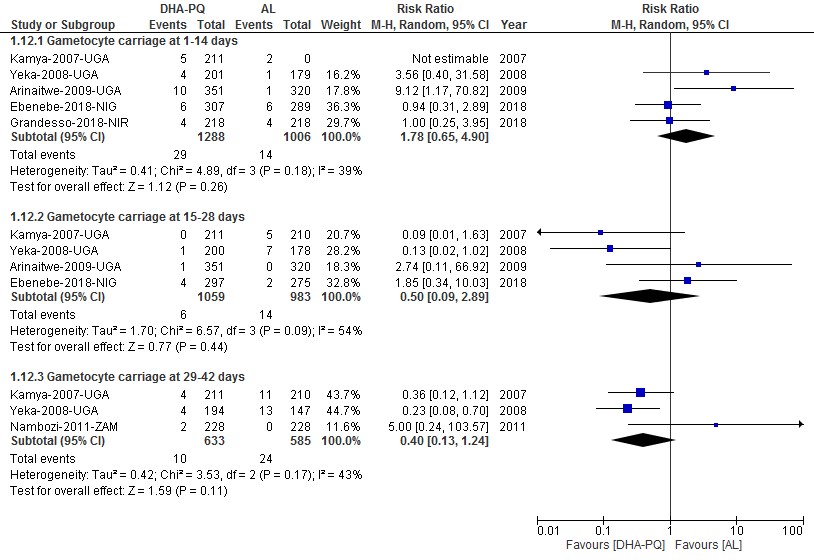


Additional file S11: Forest plot of comparison between dihydroartemisinin-piperaquine and artemether-lumefantrine for treatment of uncomplicated *plasmodium falciparum* malaria in African children on Gametocyte carriage.
