# Supplementary material for: Efficacy and Safety of Dihydroartemisinin-Piperaquine Versus Artemether-Lumefantrine for Treatment of Uncomplicated Plasmodium Falciparum Malaria In African Children: A Systematic Review And Meta-Analysis of Randomized Control Trials
Source: Research Square preprint supplement (doi:10.21203/rs.3.rs-536158/v1), 2021-05-24
Supplement: Supplementary file 4 [file d79084f102b6355e51e9a522.docx]

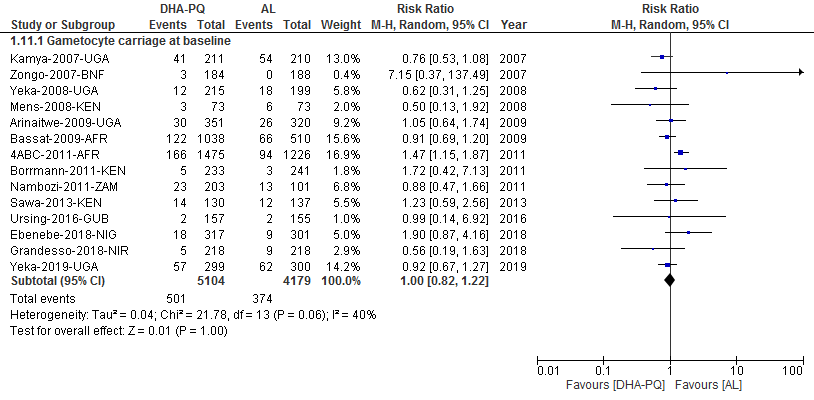


Additional file S10: Forest plot of comparison between dihydroartemisinin-piperaquine and artemether-lumefantrine for treatment of uncomplicated *plasmodium falciparum* malaria in African children on Gametocyte carriage at Baseline.
